# Supplementary material for: Seasonal changes in the abundance and biomass of copepods in the south-eastern Baltic Sea in 2010 and 2011
Source: PeerJ. 2018 Sep 6;6:e5562. doi: 10.7717/peerj.5562 (PMC6132220; doi:10.7717/peerj.5562)
Supplement: Data S1 [file peerj-06-5562-s007.xlsx]

## Sheet: P1
Data	11.02.2010				18.04.2010				03.06.2010				31.03.2011				07.05.2011				11.06.2011				12.11.2011
	Depth	T	S		Depth	T	S		Depth	T	S		Depth	T	S		Depth	T	S		Depth	T	S		glebokosc	T	S
	0	1.8336	7.4515		0	2.909	7.456		0	10.7	7.3		0	1.3891	7.2961		0	5.9511	7.1702		0	15.1785			0	11.4502	7.0373	55 00.44 N
	2	1.8405	7.4523		5	2.814	7.479		5	10.1	7.2		3	1.3894	7.2961		5	5.9844	7.1711		5	15.2368			3	11.444	7.0376	18 58.99 E
	2.5	1.8376	7.4518		10	2.819	7.482		10	9.9	7.1		3.5	1.3891	7.2961		10	5.9555	7.1702		10	13.9635			3.5	11.4332	7.0378
	3	1.837	7.4515		20	2.806	7.483		20	9.9	7.1		4	1.3893	7.2961		20	5.2817	7.1574		20	11.6378			4	11.4381	7.0373
	3.5	1.8362	7.4513		30	2.817	7.488		30	11.8	7		4.5	1.3993	7.2961		25	4.6835	7.1932		30	9.3874			4.5	11.4418	7.0375
	4	1.8377	7.4514		40	2.582	7.493		40	11.4	6.8		5	1.3891	7.2962		30	3.2536	7.263		50	6.3774			5	11.4445	7.0376
	4.5	1.8439	7.4531		50	1.88	7.536		50	13.2	6.3		5.5	1.3887	7.2964		40	2.3485	7.3024						5.5	11.4459	7.0375
	5	1.8491	7.4543		60	1.321	7.597		60	13.1	6.2		6	1.3887	7.2964		50	2.2023	7.3101						6	11.448	7.0376
	5.5	1.856	7.4556		70	1.549	7.83						6.5	1.3887	7.2964		70	3.9315	9.1694						6.5	11.4473	7.0376
	6	1.868	7.4588		75	2.898	8.137		54 50,0 N				7	1.3885	7.2966		75	5.0397	10.0627			54 50,23 N			7	11.4476	7.0377
	6.5	1.8776	7.4619		78	4.842	9.658		19 12,9 E				7.5	1.3877	7.297		80	5.4101	10.3303			19 17,11 E			7.5	11.4486	7.0377
	7	1.8919	7.467		93	8.642	12.222						8	1.3881	7.2971		100	6.2197	11.1977						8	11.4478	7.0377
	7.5	1.9147	7.4751										8.5	1.3884	7.2968										8.5	11.448	7.0377
	8	1.9353	7.4815		54°50.2304								9	1.3883	7.2969		54°50,0280								9	11.4483	7.0377
	8.5	1.9493	7.4855		19°11.5539								9.5	1.388	7.2969		19°19.0120								9.5	11.4481	7.0378
	9	1.9618	7.4915			Tmin=1,321 (60m)							10	1.3881	7.2969										10	11.4493	7.0377
	9.5	1.9768	7.4964			Tmax=8,642 (93m)							10.5	1.3886	7.2969										15	11.4495	7.0378
	10	2.0014	7.5016			Smin=7,456 (0m)							11	1.3884	7.2969										20	11.4489	7.0379
	15	2.075	7.5218			Smax=12,222 (93m)							11.5	1.3887	7.2972										23	11.4515	7.0379
	20	2.1355	7.5302										12	1.3892	7.2973										25	11.4494	7.0379
	25	2.1608	7.5399										12.5	1.3887	7.2975										30	11.4503	7.0379
	30	2.2158	7.5539										13	1.3889	7.2975										35	11.4317	7.037
	35	2.239	7.5678										13.5	1.39	7.2977										40	9.334	6.9415
	40	2.2435	7.5892										14	1.391	7.2979										45	5.5446	7.41
	45	2.2823	7.6164										14.5	1.3902	7.2977										47.5	3.5911	7.4811
	50	2.5946	7.6904										15	1.3902	7.2979										50	3.8274	7.5942
	55	3.441	8.0636										15.5	1.3916	7.2981										55	3.8656	8.2976
	60	4.3695	8.6699										16	1.3919	7.2981										60	4.151	8.8665
	65	5.1404	9.2483										16.5	1.3923	7.2981										65	4.3065	9.0439
	70	5.707	9.7188										17	1.3923	7.2983										70	4.5959	9.4512
	75	6.053	10.1463										17.5	1.3938	7.2985										75	4.7032	9.6831
	80	6.4925	10.5774										18	1.3948	7.2986										80	5.142	10.1909
	85	7.6312	11.4415										18.5	1.3964	7.299										85	5.2279	10.4859
	90	8.5198	12.198										19	1.3961	7.2991										90	5.1322	10.7285
	95	8.7563	12.37										19.5	1.3977	7.2993										92	5.1677	10.8415
	100	8.7483	12.5216										20	1.3981	7.2994
	101	8.7466	12.5544										20.5	1.3998	7.2998
	104	9.0843	12.458										21	1.4025	7.3006
	105	9.0245	12.3847										21.5	1.4027	7.3007
													22	1.4024	7.3006
	54 85.7013 N												22.5	1.4036	7.3008
	19 27.3037 E												23	1.405	7.3011
													23.5	1.4051	7.3012
		Tmin=1,8336											24	1.4051	7.3013
		Tmax=9,0843 (104m)											24.5	1.4049	7.3017
		Smin=7,4515											25	1.4054	7.3015
		Smax=12,5544 (101m)											30	1.3998	7.3024
													35	1.3956	7.303
													40	1.3978	7.3031
													45	1.3959	7.3032
													50	1.3945	7.3035
													55	1.3892	7.3036
													60	1.3844	7.3036
													65	1.3643	7.3232
													70	1.6566	7.4283
													75	2.6298	7.8589
													80	5.1452	9.9647
													85	5.8469	10.595
													90	6.055	10.8787
													92.5	6.1872	10.9675
														54 52,56 N
														19 15,52 E
										TEMPERATURE 2010 - RED; 2011 - BLUE
										SALINITY 2010 - RED; 2011 - BLUE

## Sheet: P2
Data	10.03.2010					01.04.2010					24.05.2010					21.06.2010					27.07.2010					19.08.2010					14.09.2010					13.10.2010					19.11.2010
Depth (m)	0	10	20	30	40	0	10	20	30	40	0	10	20	30	40	0	10	20	30	40	0	10	20	30	40	0	10	20	30	40	0	10	20	30	40	0	10	20	30	40	0	10	20	30	40
Temperature	1	1	1	1.2	1.4	3.1	2.7	2.4	2.2	1.8	9.7	7.8	6.8	6.8	6.7	14.7	14.3	13.7	12.8	11.3	19.1	18.8	18.7	17.8	9.9	19.4	18.9	11.2	5.4	5.3	17.3	17.2	16.3	13.1	5.9	12.2	12	12	5	4.4	8.3	8.7	8.7	8.7	8.7
Salinity	7.2	7.3	7.3	7.3	7.4	7	7.1	7.2	7.2	7.2	6.9	7	7	7	7	6.9	6.9	6.9	6.9	6.9	6.4	6.5	6.7	6.8	7	6.6	6.6	7	7.2	7.3	6.6	6.6	6.7	6.9	7.3	7	7	7	7.4	7.6	6.8	6.7	6.7	6.8	6.8
		10.03.2010		01.04.2010		24.05.2010		21.06.2010		27.07.2010		19.08.2010		14.09.2010		13.10.2010		19.11.2010
	Depth (m)	T	S	T	S	T	S	T	S	T	S	T	S	T	S	T	S	T	S		P2
	0	1	7.2	3.1	7	9.7	6.9	14.7	6.9	19.1	6.4	19.4	6.6	17.3	6.6	12.2	7	8.3	6.8		Tmin=1
	10	1	7.3	2.7	7.1	7.8	7	14.3	6.9	18.8	6.5	18.9	6.6	17.2	6.6	12	7	8.7	6.7		Tmax=19,4
	20	1	7.3	2.4	7.2	6.8	7	13.7	6.9	18.7	6.7	11.2	7	16.3	6.7	12	7	8.7	6.7
	30	1.2	7.3	2.2	7.2	6.8	7	12.8	6.9	17.8	6.8	5.4	7.2	13.1	6.9	5	7.4	8.7	6.8		Smin=6,4
	40	1.4	7.4	1.8	7.2	6.7	7	11.3	6.9	9.9	7	5.3	7.3	5.9	7.3	4.4	7.6	8.7	6.8		Smax=7,6
		14.01.2011		05.04.2011		16.05.2011		03.06.2011		27.06.2011		03.09.2011		26.09.2011		15.10.2011		23.11.2011
	Depth (m)	T	S	T	S	T	S	T	S	T	S	T	S	T	S	T	S	T	S
	0	1.2	6.8	3.3	6.9	8.8	6.6	14.9	7	16	7.1	18	7.1	16.3	7	12.3	7.2	8.1	7.1
	10	1.3	6.8	3.1	6.9	7.9	6.7	13.1	7.1	16	7.1	17.7	7.2	16.4	7.1	12.2	7.2	7.4	7.2
	20	1.7	6.8	2.3	7	7.8	6.9	12.3	7	15.9	7.1	17.7	7.2	16.4	7.1	11	7.3	7.2	7.2
	30	1.7	6.9	2.1	7	5.9	7	9	7	15.7	7.1	17.7	7.2	16.2	7.1	8.9	7.6	7	7.2
	40	2.1	7	1.9	7.1	5.6	7	7.9	7	15.7	7.1	17.4	7.2	16.1	7.1	8.6	7.6	7	7.3
Temperature	Depth (m)	I	II	III	IV	V	VI	VII	VIII	IX	X	XI	XII		Salinity		I	II	III	IV	V	VI	VII	VIII	IX	X	XI	XII
	0			1	3.1	9.7	14.7	19.1	19.4	17.3	12.2	8.3				0			7.2	7	6.9	6.9	6.4	6.6	6.6	7	6.8
	10			1	2.7	7.8	14.3	18.8	18.9	17.2	12	8.7				10			7.3	7.1	7	6.9	6.5	6.6	6.6	7	6.7
	20			1	2.4	6.8	13.7	18.7	11.2	16.3	12	8.7				20			7.3	7.2	7	6.9	6.7	7	6.7	7	6.7
	30			1.2	2.2	6.8	12.8	17.8	5.4	13.1	5	8.7				30			7.3	7.2	7	6.9	6.8	7.2	6.9	7.4	6.8
	40			1.4	1.8	6.7	11.3	9.9	5.3	5.9	4.4	8.7				40			7.4	7.2	7	6.9	7	7.3	7.3	7.6	6.8
average value				1.12	2.44	7.56	13.36	16.86	12.04	13.96	9.12	8.62			average value				7.3	7.14	6.98	6.9	6.68	6.94	6.82	7.2	6.76
sd				0.178885	0.49295	1.27789	1.35573	3.92084	6.91831	4.81747	4.04129	0.178885			sd				0.0707107	0.0894427	0.0447214	0	0.238747	0.328634	0.294958	0.282843	0.0547723
	0	1.2			3.3	8.8	14.9	16	18	16.3	12.3	8.1				0	6.8			6.9	6.6	7	7.1	7.1	7	7.2	7.1
	10	1.3			3.1	7.9	13.1	16	17.7	16.4	12.2	7.4				10	6.8			6.9	6.7	7.1	7.1	7.2	7.1	7.2	7.2
	20	1.7			2.3	7.8	12.3	15.9	17.7	16.4	11	7.2				20	6.8			7	6.9	7	7.1	7.2	7.1	7.3	7.2
	30	1.7			2.1	5.9	9	15.7	17.7	16.2	8.9	7				30	6.9			7	7	7	7.1	7.2	7.1	7.6	7.2
	40	2.1			1.9	5.6	7.9	15.7	17.4	16.1	8.6	7				40	7			7.1	7	7	7.1	7.2	7.1	7.6	7.3
average value		1.6			2.54	7.2	11.44	15.86	17.7	16.28	10.6	7.34			average value		6.86			6.98	6.84	7.02	7.1	7.18	7.08	7.38	7.2
sd		0.360555			0.622896	1.38384	2.91342	0.151658	0.212132	0.130384	1.76777	0.45607			sd		0.0894427			0.083666	0.181659	0.0447214	0	0.0447214	0.0447214	0.204939	0.0707107
							TEMPERATURE 2010 - RED; 2011 - BLUE
							SALINITY 2010 - RED; 2011 - BLUE
		Average temperature of sea water at P2								Average salinity of sea water at P2
