# Supplementary material for: Seasonal changes in the abundance and biomass of copepods in the south-eastern Baltic Sea in 2010 and 2011
Source: PeerJ. 2018 Sep 6;6:e5562. doi: 10.7717/peerj.5562 (PMC6132220; doi:10.7717/peerj.5562)
Supplement: Data S5 [file peerj-06-5562-s011.xlsx]

## Sheet: Fig. S1
SUMA	I	II	III	IV	V	VI	VII	VIII	IX	X	XI	XII
10-0 m			3957.92	4398.46	161150	37004.9	36347.3	74366.4	107458	23004.9	17333.6
20-10 m			3889.74	8429.82	40590.1	20635.1	29634	8059.8	34445.9	21667	9149.77
30-20 m			4257.37	2838.76	59609.2	104769	25420.8	9083.22	66076.4	4601.33	12012.8
40-30 m			1215.05	3501.59	9804.71	17083.6	11801.4	34396.3	23309.6	5694.84	12067.7
March2010 r.	Acartia	Temora	Pseudocalanus	Centropages	Eurytemora	suma
10-0 m	3037.17	331.304	352.017	237.432	0	3957.92
20-10 m	2125	602.162	830.003	332.573	0	3889.74				Station P2 Abundance in 2010 in layers
30-20 m	1886.38	527.128	1242.98	600.882	0	4257.37
40-30 m	260.019	216.799	393.185	345.047	0	1215.05
April 2010 r.	Acartia	Temora	Pseudocalanus	Centropages	Eurytemora	suma
10-0 m	2716.19	684.229	726.08	271.964	0	4398.46
20-10 m	5361.02	662.05	2097.36	309.384	0	8429.82
30-20 m	1135.39	234.815	1296.1	172.453	0	2838.76
40-30 m	1665.05	172.142	1469.88	194.518	0	3501.59
May 2010 r.	Acartia	Temora	Pseudocalanus	Centropages	Eurytemora	suma
10-0 m	65830.1	61908.5	2300.65	31111.1	0	161150
20-10 m	18816.1	20780.6	836.6	156.863	0	40590.1
30-20 m	29656.9	28277.9	1054.77	619.734	0	59609.2
40-30 m	4408.65	5019.51	289.971	86.5788	0	9804.71
June 2010 r.	Acartia	Temora	Pseudocalanus	Centropages	Eurytemora	suma
10-0 m	35221	1385.51	65.4149	333.005	0	37004.9
20-10 m	18808.3	1189.03	0	616.134	21.6187	20635.1
30-20 m	96525.3	5284.58	38.4324	2882.5	38.4324	104769
40-30 m	9031.95	5633.53	26.5733	2391.59	0	17083.6
July 2010 r.	Acartia	Temora	Pseudocalanus	Centropages	Eurytemora	suma
10-0 m	32972.5	2201.24	0	1173.56	0	36347.3
20-10 m	28692.9	400.156	0	540.954	0	29634
30-20 m	23272.6	1673.14	0	475.088	0	25420.8
40-30 m	8621.83	2791.46	105.471	278.909	3.76526	11801.4
Augest 2010 r.	Acartia	Temora	Pseudocalanus	Centropages	Eurytemora	suma
10-0 m	63023.6	10887.3	0	455.53	0	74366.4
20-10 m	5867.8	2020.05	85.035	86.9228	0	8059.8
30-20 m	3343.4	4019.81	1307.73	386.52	25.768	9083.22
40-30 m	20502.1	9836.47	3767.04	290.652	0	34396.3
September 2010 r.	Acartia	Temora	Pseudocalanus	Centropages	Eurytemora	suma
10-0 m	96434.6	9385.21	881.832	692.868	62.988	107458
20-10 m	31880.4	2363.65	28.825	172.95	0	34445.9
30-20 m	60074	5452.18	200.08	350.14	0	66076.4
40-30 m	16840.2	6402.62	16.6735	50.0205	0	23309.6
October 2010 r.	Acartia	Temora	Pseudocalanus	Centropages	Eurytemora	suma
10-0 m	9771.39	8913.45	402.396	1662.73	2254.94	23004.9
20-10 m	6356.7	9671.21	351.864	3916.79	1370.42	21667
30-20 m	807.833	1946.35	217.313	1421.97	207.862	4601.33
40-30 m	496.044	2351.38	380.085	2357.82	109.516	5694.84
November 2010 r.	Acartia	Temora	Pseudocalanus	Centropages	Eurytemora	suma
10-0 m	5985.72	8253.31	1150.46	1944.11	0	17333.6
20-10 m	1853.76	4591.89	680.28	2006.83	17.007	9149.77
30-20 m	4081.57	5179.27	703.453	1963.48	85.0327	12012.8
40-30 m	4369.34	4676.91	714.654	2270.61	36.185	12067.7

## Sheet: Fig.S2
SUMA	I	II	III	IV	V	VI	VII	VIII	IX	X	XI	XII
10-0 m	8748.42			3305.17	19746.5	50199.3		6638.07	70314.2	18251	10151.9
20-10 m	12385.5			1176.7	25973.9	1909.64	26374.3	30484.7	48779.5	3339.72	17159.4
30-20 m	5963.96			334.618	16618.5	17297.8	15256.1	35501.9	26720.6	7031.22	7007.64
40-30 m	7232.45			622.008	7202.35	19213	24022.1	36914.8	12420.2	14446.9	13147.8
January 2011 r.	Acartia	Temora	Pseudocalanus	Centropages	Eurytemora	suma				Station P2 Abundance in 2011 in layers
10-0 m	6748.2	867.246	466.235	606.348	60.3932	8748.42
20-10 m	10583.6	1270.44	217.644	253.075	60.738	12385.5
30-20 m	4335.78	1311.77	118.653	184.571	13.1837	5963.96
40-30 m	4746.15	1520.43	314.253	637.75	13.8641	7232.45
April 2011 r.	Acartia	Temora	Pseudocalanus	Centropages	Eurytemora	suma
10-0 m	2310.33	52.7989	822.337	88.9244	30.7815	3305.17
20-10 m	699.908	186.467	230.603	59.726	0	1176.7
30-20 m	132.989	95.9115	89.9362	15.781	0	334.618
40-30 m	144.959	297.1	132.549	46.5386	0.861825	622.008
May 2011 r.	Acartia	Temora	Pseudocalanus	Centropages	Eurytemora	suma
10-0 m	2989.3	14598.6	1948.31	210.339	0	19746.5
20-10 m	3710.78	21211.6	960.784	85.7843	4.90196	25973.9
30-20 m	2515.15	13415.3	549.02	139.037	0	16618.5
40-30 m	1776.09	4455.74	951.002	18.486	1.027	7202.35
June 2011 r.	Acartia	Temora	Pseudocalanus	Centropages	Eurytemora	suma
10-0 m	21639.6	25422.2	381.186	2375.08	381.186	50199.3
20-10 m	642.217	1187.25	22.676	54.2604	3.23943	1909.64
30-20 m	4296.48	12027.9	861.534	111.888	0	17297.8
40-30 m	3688.61	13134.2	2194.78	195.347	0	19213
July 2011 r.	Acartia	Temora	Pseudocalanus	Centropages	Eurytemora	suma
20-0 m	18812.8	6288.77	0	727.273	545.455	26374.3
30-20 m	11815.5	2805.92	21.392	506.277	106.96	15256.1
40-30 m	10923.3	10978.6	27.654	1631.59	460.9	24022.1
August 2011 r.	Acartia	Temora	Pseudocalanus	Centropages	Eurytemora	suma
10-0 m	6395.12	226.758	0	16.197	0	6638.07
20-10 m	26700.7	3082.48	0	701.53	0	30484.7
30-20 m	30399.8	3153.36	0	1736.12	212.586	35501.9
40-30 m	29886.9	5402.16	0	1275.51	350.14	36914.8
September 2011 r.	Acartia	Temora	Pseudocalanus	Centropages	Eurytemora	suma
10-0 m	62455.9	6392.2	117.288	1290.17	58.644	70314.2
20-10 m	41641.6	4939.78	0	2190.05	8.11129	48779.5
30-20 m	16702.5	6226.72	0	3369.59	421.766	26720.6
40-30 m	6835.88	3751.08	0	1593.93	239.274	12420.2
October 2011 r.	Acartia	Temora	Pseudocalanus	Centropages	Eurytemora	suma
10-0 m	10365	4776.72	33.2743	2728.5	347.532	18251
20-10 m	1720.57	1032.34	12.8434	518.164	55.8022	3339.72
30-20 m	3584.19	2304.12	36.5733	1024.05	82.29	7031.22
40-30 m	4437.69	6722.97	885.767	2258.71	141.723	14446.9
November 2011 r.	Acartia	Temora	Pseudocalanus	Centropages	Eurytemora	suma
10-0 m	4713.83	3825.24	175.133	1437.73	0	10151.9
20-10 m	7696.64	5712.52	824.172	2878.06	47.9677	17159.4
30-20 m	3222.56	2193.43	209.314	1349.64	32.7053	7007.64
40-30 m	6175.72	4396.65	446.616	2087.41	41.4081	13147.8

## Sheet: Fig.S3
depth	I	II	III	IV	V	VI	VII	VIII	IX	X	XI	XII	mg/m3
10-0 m			34552.4	45346.9	692115	117870	201121	320959	310512	104025	175178
20-10 m			39104.2	55829.7	267856	133769	88605.9	35403.4	121098	83403	92458.6
30-20 m			44898.7	19831.7	503466	509912	88568.7	137587	212910	25471.4	104570
40-30 m			16924.9	22759.1	97058.6	249859	88625.5	183032	102415	40322.9	85211.6
depth	I	II	III	IV	V	VI	VII	VIII	IX	X	XI	XII	mg/m3
10-0 m			34.5524	45.3469	692.115	117.87	201.121	320.959	310.512	104.025	175.178
20-10 m			39.1042	55.8297	267.856	133.769	88.6059	35.4034	121.098	83.403	92.4586
30-20 m			44.8987	19.8317	503.466	509.912	88.5687	137.587	212.91	25.4714	104.57
40-30 m			16.9249	22.7591	97.0586	249.859	88.6255	183.032	102.415	40.3229	85.2116
March 2010	Acartia	Temora	Pseudocalanus	Centropages	Eurytemora	suma	mg/m3
10-0 m	13913.6	10187.6	5379.14	5072.09	0	34552.4
20-10 m	10132	15110.3	7761.38	6100.56	0	39104.2					Station P2 Biomass 2010 (in layers)
30-20 m	9922.8	14533.5	9561.62	10880.7	0	44898.7
40-30 m	1562.59	5429.12	3886.66	6046.55	0	16924.9
April 2010	Acartia	Temora	Pseudocalanus	Centropages	Eurytemora	suma
10-0 m	10385.1	24512.7	3920.51	6528.65	0	45346.9
20-10 m	18149.2	22064.3	8093.96	7522.21	0	55829.7
30-20 m	5682.13	6837.82	4579.4	2732.38	0	19831.7
40-30 m	9855.39	5324.38	4973.37	2605.94	0	22759.1
May 2010	Acartia	Temora	Pseudocalanus	Centropages	Eurytemora	suma
10-0 m	357203	239106	6713.73	89092.8	0	692115
20-10 m	150283	113662	2990.83	920.257	0	267856
30-20 m	301559	192770	4978.38	4158.78	0	503466
40-30 m	53350.3	41234.8	1075.23	1398.25	0	97058.6
June 2010	Acartia	Temora	Pseudocalanus	Centropages	Eurytemora	suma
10-0 m	101381	6838.02	1275.04	8375.84	0	117870
20-10 m	102026	19539.6	0	11684.4	518.85	133769
30-20 m	386349	57615.5	384.324	64833.1	730.215	509912
40-30 m	82119.5	115551	79.7198	52108.3	0	249859
July 2010	Acartia	Temora	Pseudocalanus	Centropages	Eurytemora	suma
10-0 m	164006	21838.6	0	15275.9	0	201121
20-10 m	84710.7	1212.7	0	2682.44	0	88605.9
30-20 m	80621	6205.11	0	1742.53	0	88568.7
40-30 m	49740.3	34495.9	470.855	3846.91	71.5398	88625.5
August 2010	Acartia	Temora	Pseudocalanus	Centropages	Eurytemora	suma
10-0 m	273288	39701.2	0	7969.39	0	320959
20-10 m	23519.9	10265.4	255.105	1363.02	0	35403.4
30-20 m	23983.2	97382.1	10750.4	5419.33	51.536	137587
40-30 m	77119.4	83352.1	18949.7	3610.66	0	183032
September 2010	Acartia	Temora	Pseudocalanus	Centropages	Eurytemora	suma
10-0 m	277566	28442.2	2645.5	1732.17	125.976	310512
20-10 m	113488	7090.95	86.475	432.375	0	121098
30-20 m	195078	16356.5	600.24	875.35	0	212910
40-30 m	81500.1	20164.9	50.0205	700.287	0	102415
October 2010	Acartia	Temora	Pseudocalanus	Centropages	Eurytemora	suma
10-0 m	56480.4	30415.1	1369.66	7043.83	8716.05	104025
20-10 m	27620	34664.2	1055.59	13424.2	6639.03	83403
30-20 m	5217.83	10005.5	1889.68	7172.64	1185.77	25471.4
40-30 m	5712.23	17119	3002.67	13174.8	1314.19	40322.9
November 2010	Acartia	Temora	Pseudocalanus	Centropages	Eurytemora	suma
10-0 m	23462.6	118715	12753.4	20247.2	0	175178
20-10 m	20112.5	47222.9	6265.38	18407.1	450.686	92458.6
30-20 m	23753.9	51662.8	7562.5	20663	927.63	104570
40-30 m	19222.4	37115	5630.39	22936.3	307.572	85211.6

## Sheet: Fig.S4
depth	I	II	III	IV	V	VI	VII	VIII	IX	X	XI	XII	mg/m3
10-0 m	65082.5			15835.6	60892.7	258141		56143.9	403981	110830	43962.6
20-10 m	82626.7			14230.5	79578.7	10849.1	140927	117877	120129	21572	80812.3
30-20 m	61548.8			5013.62	50258.9	137403	90542.4	139642	82080.7	56958.4	36631
40-30 m	86260			14523	23590.1	166690	187954	232814	53073.6	128403	60320.8
depth	I	II	III	IV	V	VI	VII	VIII	IX	X	XI	XII	mg/m3
10-0 m	65.0825	0	0	15.8356	60.8927	258.141	0	56.1439	403.981	110.83	43.9626
20-10 m	82.6267	0	0	14.2305	79.5787	10.8491	140.927	117.877	120.129	21.572	80.8123
30-20 m	61.5488	0	0	5.01362	50.2589	137.403	90.5424	139.642	82.0807	56.9584	36.631
40-30 m	86.26	0	0	14.523	23.5901	166.69	187.954	232.814	53.0736	128.403	60.3208
January 2011	Acartia	Temora	Pseudocalanus	Centropages	Eurytemora	suma	mg/m3
10-0 m	29550.3	17493.6	7729.6	9596.36	712.64	65082.5
20-10 m	49261	25297.9	3980.87	3201.15	885.762	82626.7				Station P2 Copepoda Biomass 2011 (in layers)
30-20 m	26092.5	30857.7	1427.79	2920.35	250.49	61548.8
40-30 m	28595.7	41970.9	3232.65	12197.4	263.418	86260
April 2011	Acartia	Temora	Pseudocalanus	Centropages	Eurytemora	suma
10-0 m	8389.94	2231.45	4083.49	1069.18	61.5631	15835.6
20-10 m	4768.11	7091.14	1145.32	1225.9	0	14230.5
30-20 m	897.708	3241.61	580.985	293.312	0	5013.62
40-30 m	1519.44	10386.5	1599.03	997.39	20.6838	14523
May 2011	Acartia	Temora	Pseudocalanus	Centropages	Eurytemora	suma
10-0 m	7315.24	46696.7	5910.34	970.41	0	60892.7
20-10 m	9235.05	66882.9	2882.35	485.294	93.1373	79578.7
30-20 m	6007.93	42182.4	1647.06	421.569	0	50258.9
40-30 m	5017.19	15423.1	3084.08	46.215	19.513	23590.1
June 2011	Acartia	Temora	Pseudocalanus	Centropages	Eurytemora	suma
10-0 m	123217	121191	1384	10619	1730	258141
20-10 m	3437.11	7085.04	68.028	197.362	61.5491	10849.1
30-20 m	38594.5	95868	2609.22	331.187	0	137403
40-30 m	37688.2	118868	7172.68	2961.23	0	166690
July 2011	Acartia	Temora	Pseudocalanus	Centropages	Eurytemora	suma
20-0 m	99000.5	30069	0	9429.41	2427.81	140927
30-20 m	71746.6	12040.5	64.176	5806.86	884.203	90542.4
40-30 m	81939.7	75807	82.962	25902.1	4221.84	187954
August 2011	Acartia	Temora	Pseudocalanus	Centropages	Eurytemora	suma
10-0 m	54863.6	1239.88	0	40.4925	0	56143.9
20-10 m	102587	13532.1	0	1758.08	0	117877
30-20 m	120923	10934	0	5658.33	2125.86	139642
40-30 m	203396	18303.6	0	8538.41	2576.03	232814
Septemper 2011	Acartia	Temora	Pseudocalanus	Centropages	Eurytemora	suma
10-0 m	380418	19669.2	351.864	3248.88	293.22	403981
20-10 m	97085.7	16804.2	0	5963.42	275.784	120129
30-20 m	44800.7	24735.2	0	10631	1913.82	82080.7
40-30 m	26523	18902.7	0	5685.89	1962.05	53073.6
October 2011	Acartia	Temora	Pseudocalanus	Centropages	Eurytemora	suma
10-0 m	65097.4	28962.4	173.766	14681.8	1915.12	110830
20-10 m	11810.6	6369.36	77.0603	2756.96	558.023	21572
30-20 m	31458.3	17764.6	377.163	6645.15	713.18	56958.4
40-30 m	41761.2	58155.9	10198.7	16780.8	1505.8	128403
November 2011	Acartia	Temora	Pseudocalanus	Centropages	Eurytemora	suma
10-0 m	16895.5	18046.2	1647.94	7372.9	0	43962.6
20-10 m	25738.2	31957.8	8136.19	14374	606.137	80812.3
30-20 m	13061.2	13591.3	2903.35	6667.4	407.725	36631
40-30 m	18720.1	24896.2	4812.51	11312.2	579.713	60320.8
